# Supplementary material for: Domain shifts decrease the accuracy of machine learning algorithms to detect myocardial ischemia in ECG recordings: A multi-database analysis
Source: Research Square preprint supplement (doi:10.21203/rs.3.rs-7893141/v1), 2025-11-13
Supplement: Supplementary file 1 [file 6eb1666dc83453bfe1fccda9.docx]

**Electronic Supplementary Material Table 1.** Results of the analyses of individual databases (“Single”).

| **PTB Database** | | | | | | | |
| --- | --- | --- | --- | --- | --- | --- | --- |
|  | **AUC** | **bACC** | **F1** | **PPV** | **NPV** | **Sens** | **Spec** |
| **GLM** | 0.844 | 0.854 | 0.034 | 1.000 | 0.842 | 0.018 | 1.000 |
| **RF** | 0.886 | 0.829 | 0.034 | 1.000 | 1.000 | 0.018 | 1.000 |
| **GBM** | 0.925 | 0.878 | 0.813 | 1.000 | 0.941 | 0.684 | 1.000 |
| **XGBOOST** | 0.898 | 0.878 | 0.034 | 1.000 | 0.941 | 0.018 | 1.000 |
| **DNN** | 0.896 | 0.890 | 0.725 | 0.971 | 0.864 | 0.579 | 0.960 |
| **AML** | 0.928 | 0.866 | 0.034 | 1.000 | 0.818 | 0.018 | 1.000 |
| **PTB-XL Database** | | | | | | | |
|  | **AUC** | **bACC** | **F1** | **PPV** | **NPV** | **Sens** | **Spec** |
| **GLM** | 0.841 | 0.809 | 0.006 | 1.000 | 0.868 | 0.003 | 1.000 |
| **RF** | 0.907 | 0.846 | 0.008 | 1.000 | 0.906 | 0.004 | 1.000 |
| **GBM** | 0.924 | 0.863 | 0.109 | 1.000 | 0.910 | 0.058 | 1.000 |
| **XGBOOST** | 0.923 | 0.870 | 0.282 | 0.975 | 0.905 | 0.165 | 0.998 |
| **DNN** | 0.891 | 0.852 | 0.022 | 0.889 | 0.892 | 0.011 | 0.999 |
| **AML** | 0.929 | 0.872 | 0.006 | 1.000 | 0.914 | 0.003 | 1.000 |
| **Georgia Database** | | | | | | | |
|  | **AUC** | **bACC** | **F1** | **PPV** | **NPV** | **Sens** | **Spec** |
| **GLM** | 0.797 | 0.784 | 0.014 | 1.000 | 0.943 | 0.007 | 1.000 |
| **RF** | 0.881 | 0.857 | 0.014 | 1.000 | 0.945 | 0.007 | 1.000 |
| **GBM** | 0.882 | 0.837 | 0.067 | 1.000 | 0.960 | 0.035 | 1.000 |
| **XGBOOST** | 0.866 | 0.813 | 0.014 | 1.000 | 0.961 | 0.007 | 1.000 |
| **DNN** | 0.797 | 0.770 | 0.014 | 1.000 | 0.947 | 0.007 | 1.000 |
| **AML** | 0.884 | 0.831 | 0.014 | 1.000 | 0.966 | 0.007 | 1.000 |
| **CPSC 2018 Database** | | | | | | | |
|  | **AUC** | **bACC** | **F1** | **PPV** | **NPV** | **Sens** | **Spec** |
| **GLM** | 0.824 | 0.839 | 0.020 | 1.000 | 0.915 | 0.010 | 1.000 |
| **RF** | 0.884 | 0.898 | 0.020 | 1.000 | 0.935 | 0.010 | 1.000 |
| **GBM** | 0.909 | 0.902 | 0.371 | 0.920 | 0.938 | 0.232 | 0.996 |
| **XGBOOST** | 0.913 | 0.888 | 0.020 | 1.000 | 0.950 | 0.010 | 1.000 |
| **DNN** | 0.902 | 0.890 | NaN | 0.000 | 0.951 | 0.000 | 0.998 |
| **AML** | 0.919 | 0.901 | 0.020 | 1.000 | 0.941 | 0.010 | 1.000 |
| **CPSC 2018 extra Database** | | | | | | | |
|  | **AUC** | **bACC** | **F1** | **PPV** | **NPV** | **Sens** | **Spec** |
| **GLM** | 0.526 | 0.445 | NaN | 0.000 | 0.896 | 0.000 | 0.997 |
| **RF** | 0.555 | 0.247 | NaN | 0.000 | 0.952 | 0.000 | 0.997 |
| **GBM** | 0.559 | 0.586 | NaN | 0.000 | 0.894 | 0.000 | 0.997 |
| **XGBOOST** | 0.586 | 0.644 | NaN | 0.000 | 0.896 | 0.000 | 0.997 |
| **DNN** | 0.458 | 0.204 | NaN | 0.000 | 0.926 | 0.000 | 0.997 |
| **AML** | 0.541 | 0.457 | NaN | 0.000 | 0.924 | 0.000 | 0.997 |

bACC, balanced accuracy; AML, ensemble learning; AUC, area under the receiver operator characteristic curve; CPSC 2018, China Physiological Signal Challenge 2018 database; CPSC 2018 extra, China Physiological Signal Challenge Extra database; DNN, deep neural networks; GBM, gradient boosting machines; GLM, generalized linear models; NaN, not a number; NPV, negative predictive value; PPV, positive predictive value; PTB, Physikalische-Technische Bundesanstalt Diagnostic ECG database; PTB-XL, Physikalische-Technische Bundesanstalt Diagnostic ECG XL database; RF, random forests; Sens, sensitivity; Spec, specificity; XGBOOST, extreme gradient boosting.

**Electronic Supplementary Material Table 2.** Results of the analyses when all databases were combined (“All”).

|  | **AUC** | **bACC** | **F1** | **PPV** | **NPV** | **Sens** | **Spec** |
| --- | --- | --- | --- | --- | --- | --- | --- |
| **GLM** | 0.780 | 0.727 | NaN | 1.000 | 0.866 | 0.000 | 1.000 |
| **RF** | 0.836 | 0.754 | 0.002 | 1.000 | 0.899 | 0.001 | 1.000 |
| **GBM** | 0.852 | 0.768 | 0.015 | 1.000 | 0.907 | 0.008 | 1.000 |
| **XGBOOST** | 0.861 | 0.781 | 0.074 | 0.074 | 0.908 | 0.039 | 1.000 |
| **DNN** | 0.817 | 0.739 | 0.007 | 0.800 | 0.888 | 0.003 | 1.000 |
| **AML** | 0.863 | 0.764 | 0.001 | 1.000 | 0.904 | 0.003 | 1.000 |

bACC, balanced accuracy; AML, ensemble learning; AUC, area under the receiver operator characteristic curve; DNN, deep neural networks; GBM, gradient boosting machines; GLM, generalized linear models; NaN, not a number; NPV, negative predictive value; PPV, positive predictive value; RF, random forests; Sens, sensitivity; Spec, specificity; XGBOOST, extreme gradient boosting.

**Electronic Supplementary Material Table 3.** Results of the analyses when all databases were combined but one database was left out (“One-out”).

| **PTB Database out** | | | | | | | |
| --- | --- | --- | --- | --- | --- | --- | --- |
|  | **AUC** | **bACC** | **F1** | **PPV** | **NPV** | **Sens** | **Spec** |
| **GLM** | 0.723 | 0.720 | 0.008 | 1.000 | 0.867 | 0.004 | 1.000 |
| **RF** | 0.800 | 0.799 | 0.008 | 1.000 | 0.753 | 0.004 | 1.000 |
| **GBM** | 0.816 | 0.785 | 0.008 | 1.000 | 0.743 | 0.004 | 1.000 |
| **XGBOOST** | 0.805 | 0.768 | 0.008 | 1.000 | 0.719 | 0.004 | 1.000 |
| **DNN** | 0.742 | 0.760 | 0.008 | 1.000 | 0.626 | 0.004 | 1.000 |
| **AML** | 0.813 | 0.782 | 0.008 | 1.000 | 0.770 | 0.004 | 1.000 |
| **PTB-XL Database out** | | | | | | | |
|  | **AUC** | **bACC** | **F1** | **PPV** | **NPV** | **Sens** | **Spec** |
| **GLM** | 0.766 | 0.736 | 0.001 | 1.000 | 0.827 | 0.000 | 1.000 |
| **RF** | 0.815 | 0.757 | 0.001 | 1.000 | 0.857 | 0.000 | 1.000 |
| **GBM** | 0.795 | 0.740 | 0.001 | 1.000 | 0.842 | 0.000 | 1.000 |
| **XGBOOST** | 0.776 | 0.714 | 0.002 | 1.000 | 0.835 | 0.001 | 1.000 |
| **DNN** | 0.795 | 0.739 | 0.001 | 1.000 | 0.852 | 0.001 | 1.000 |
| **AML** | 0.820 | 0.764 | 0.001 | 1.000 | 0.855 | 0.000 | 1.000 |
| **Georgia Database out** | | | | | | | |
|  | **AUC** | **bACC** | **F1** | **PPV** | **NPV** | **Sens** | **Spec** |
| **GLM** | 0.780 | 0.741 | NaN | 0.000 | 0.928 | 0.000 | 1.000 |
| **RF** | 0.802 | 0.773 | 0.005 | 1.000 | 0.922 | 0.002 | 1.000 |
| **GBM** | 0.795 | 0.770 | 0.017 | 0.583 | 0.915 | 0.009 | 0.999 |
| **XGBOOST** | 0.789 | 0.729 | 0.040 | 0.472 | 0.929 | 0.021 | 0.995 |
| **DNN** | 0.723 | 0.751 | NaN | 0.000 | 0.896 | 0.000 | 1.000 |
| **AML** | 0.798 | 0.740 | 0.002 | 0.500 | 0.931 | 0.001 | 1.000 |
| **CPSC 2018 Database out** | | | | | | | |
|  | **AUC** | **bACC** | **F1** | **PPV** | **NPV** | **Sens** | **Spec** |
| **GLM** | 0.484 | 0.289 | NaN | 0.000 | 0.884 | 0.000 | 1.000 |
| **RF** | 0.465 | 0.287 | NaN | 0.000 | 0.863 | 0.000 | 1.000 |
| **GBM** | 0.508 | 0.253 | 0.003 | 0.125 | 0.882 | 0.002 | 0.997 |
| **XGBOOST** | 0.508 | 0.324 | 0.003 | 0.143 | 0.855 | 0.002 | 0.998 |
| **DNN** | 0.485 | 0.253 | NaN | 0.000 | 0.909 | 0.000 | 1.000 |
| **AML** | 0.514 | 0.342 | NaN | 0.000 | 0.884 | 0.000 | 1.000 |
| **CPSC 2018 extra Database out** | | | | | | | |
|  | **AUC** | **bACC** | **F1** | **PPV** | **NPV** | **Sens** | **Spec** |
| **GLM** | 0.486 | 0.165 | NaN | 0.000 | 1.000 | 0.000 | 0.999 |
| **RF** | 0.480 | 0.169 | NaN | 0.000 | 1.000 | 0.000 | 0.999 |
| **GBM** | 0.484 | 0.163 | 0.014 | 0.133 | NaN | 0.007 | 0.991 |
| **XGBOOST** | 0.497 | 0.199 | 0.033 | 0.185 | 0.878 | 0.018 | 0.985 |
| **DNN** | 0.494 | 0.170 | 0.014 | 0.333 | 1.000 | 0.007 | 0.997 |
| **AML** | 0.489 | 0.176 | 0.007 | 1.000 | 0.958 | 0.004 | 1.000 |
| **St. Petersburg out** | | | | | | | |
|  | **AUC** | **bACC** | **F1** | **PPV** | **NPV** | **Sens** | **Spec** |
| **GLM** | 0.412 | 0.531 | 0.111 | 1.000 | - | 0.059 | 1.000 |
| **RF** | 0.455 | 0.562 | 0.111 | 1.000 | 1.000 | 0.059 | 1.000 |
| **GBM** | 0.365 | 0.531 | 0.111 | 1.000 | - | 0.059 | 1.000 |
| **XGBOOST** | 0.627 | 0.531 | 0.111 | 1.000 | - | 0.059 | 1.000 |
| **DNN** | 0.576 | 0.594 | - | 0.000 | 0.667 | 0.000 | 0.933 |
| **AML** | 0.616 | 0.594 | 0.111 | 0.000 | 0.667 | 0.000 | 0.933 |

bACC, balanced accuracy; AML, ensemble learning; AUC, area under the receiver operator characteristic curve; CPSC 2018, China Physiological Signal Challenge 2018 database; CPSC 2018 extra, China Physiological Signal Challenge Extra database; DNN, deep neural networks; GBM, gradient boosting machines; GLM, generalized linear models; NPV, negative predictive value; PPV, positive predictive value; PTB, Physikalische-Technische Bundesanstalt Diagnostic ECG database; PTB-XL, Physikalische-Technische Bundesanstalt Diagnostic ECG XL database; RF, random forests; Sens, sensitivity; Spec, specificity; XGBOOST, extreme gradient boosting.
